# Supplementary material for: Giα proteins exhibit functional differences in the activation of ERK1/2, Akt and mTORC1 by growth factors in normal and breast cancer cells
Source: PubMed Central journal article supplement (PMC3937014; doi:10.1186/1478-811x-12-10), 2014-02-13

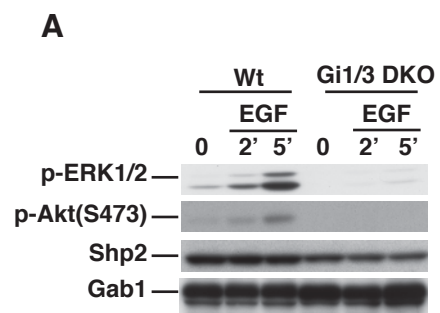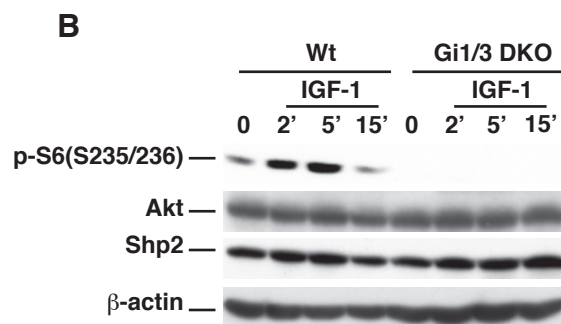

Supplement: 1478-811X-12-10-S5.pdf [file 1478-811X-12-10-S5.pdf]
